# Supplementary material for: Low FAT4 expression is associated with a poor prognosis in gastric cancer patients
Source: PubMed Central journal article supplement (PMC5797039; doi:10.18632/oncotarget.23702), 2017-12-26
Supplement: oncotarget-09-5137-s001.pdf [file oncotarget-09-5137-s001.pdf]

# Low FAT4 expression is associated with a poor prognosis in gastric cancer patients

## SUPPLEMENTARY MATERIALS

| Methylation Rate (%) |                  |                  |                  |                  |                  |                | Sample No. | Meth. Satus           |
|----------------------|------------------|------------------|------------------|------------------|------------------|----------------|------------|-----------------------|
| Pos. 1               | Pos. 2           | Pos. 3           | Pos. 4           | Pos. 5           | Pos. 6           | Ave.           |            |                       |
| Pos. 1 Meth. (%)     | Pos. 2 Meth. (%) | Pos. 3 Meth. (%) | Pos. 4 Meth. (%) | Pos. 5 Meth. (%) | Pos. 6 Meth. (%) | Mean Meth. (%) |            |                       |
|                      |                  |                  |                  |                  |                  | 39.89          | No.4       | High Methylated (>5%) |
|                      |                  |                  |                  |                  |                  | 34.52          | No.12      |                       |
|                      |                  |                  |                  |                  |                  | 20.1           | No.18      |                       |
|                      |                  |                  |                  |                  |                  | 19.54          | No.14      |                       |
|                      |                  |                  |                  |                  |                  | 18.13          | No.15      |                       |
|                      |                  |                  |                  |                  |                  | 14.2           | No.11      |                       |
|                      |                  |                  |                  |                  |                  | 13.96          | No.13      |                       |
|                      |                  |                  |                  |                  |                  | 13.19          | No.16      |                       |
|                      |                  |                  |                  |                  |                  | 11.07          | No.17      |                       |
|                      |                  |                  |                  |                  |                  | 8.745          | No.2       |                       |
|                      |                  |                  |                  |                  |                  | 6.525          | No.37      |                       |
|                      |                  |                  |                  |                  |                  | 6.315          | No.20      |                       |
|                      |                  |                  |                  |                  |                  | 4.783          | No.10      | Low Methylated (<5%)  |
|                      |                  |                  |                  |                  |                  | 3.493          | No.32      |                       |
|                      |                  |                  |                  |                  |                  | 2.462          | No.9       |                       |
|                      |                  |                  |                  |                  |                  | 0.258          | No.6       |                       |
|                      |                  |                  |                  |                  |                  | -1.81          | No.21      | Un-Methylated         |
|                      |                  |                  |                  |                  |                  | -2.69          | No.31      |                       |
|                      |                  |                  |                  |                  |                  | -4.29          | No.5       |                       |
|                      |                  |                  |                  |                  |                  | -4.79          | No.19      |                       |
|                      |                  |                  |                  |                  |                  | -5.42          | No.22      |                       |
|                      |                  |                  |                  |                  |                  | -5.83          | No.24      |                       |
|                      |                  |                  |                  |                  |                  | -7.78          | No.25      |                       |
|                      |                  |                  |                  |                  |                  | -8.66          | No.26      |                       |
|                      |                  |                  |                  |                  |                  | -10.8          | No.1       |                       |
|                      |                  |                  |                  |                  |                  | -11            | No.33      |                       |
|                      |                  |                  |                  |                  |                  | -11.5          | No.35      |                       |
|                      |                  |                  |                  |                  |                  | -11.9          | No.8       |                       |
|                      |                  |                  |                  |                  |                  | -12.2          | No.34      |                       |
|                      |                  |                  |                  |                  |                  | -12.5          | No.3       |                       |
|                      |                  |                  |                  |                  |                  | -13.3          | No.30      |                       |
|                      |                  |                  |                  |                  |                  | -13.3          | No.28      |                       |

**Supplementary Figure 1: Methylation pyrosequencing analysis of FAT4 promoter in GC tissue samples.** Histogram shows mean methylation percentage based on pyrosequencing of 6 CpG sites in the FAT4 promoter region of GC tumor tissues relative to adjacent noncancerous tissues (n=32). Note: if mean methylation percentage was lower than 0%, the samples are referred to as unmethylated; if mean methylation percentage was between 0-5% or >5%, they are referred to as low and high methylated. Both low- and high- methylated groups were included in methylated group.

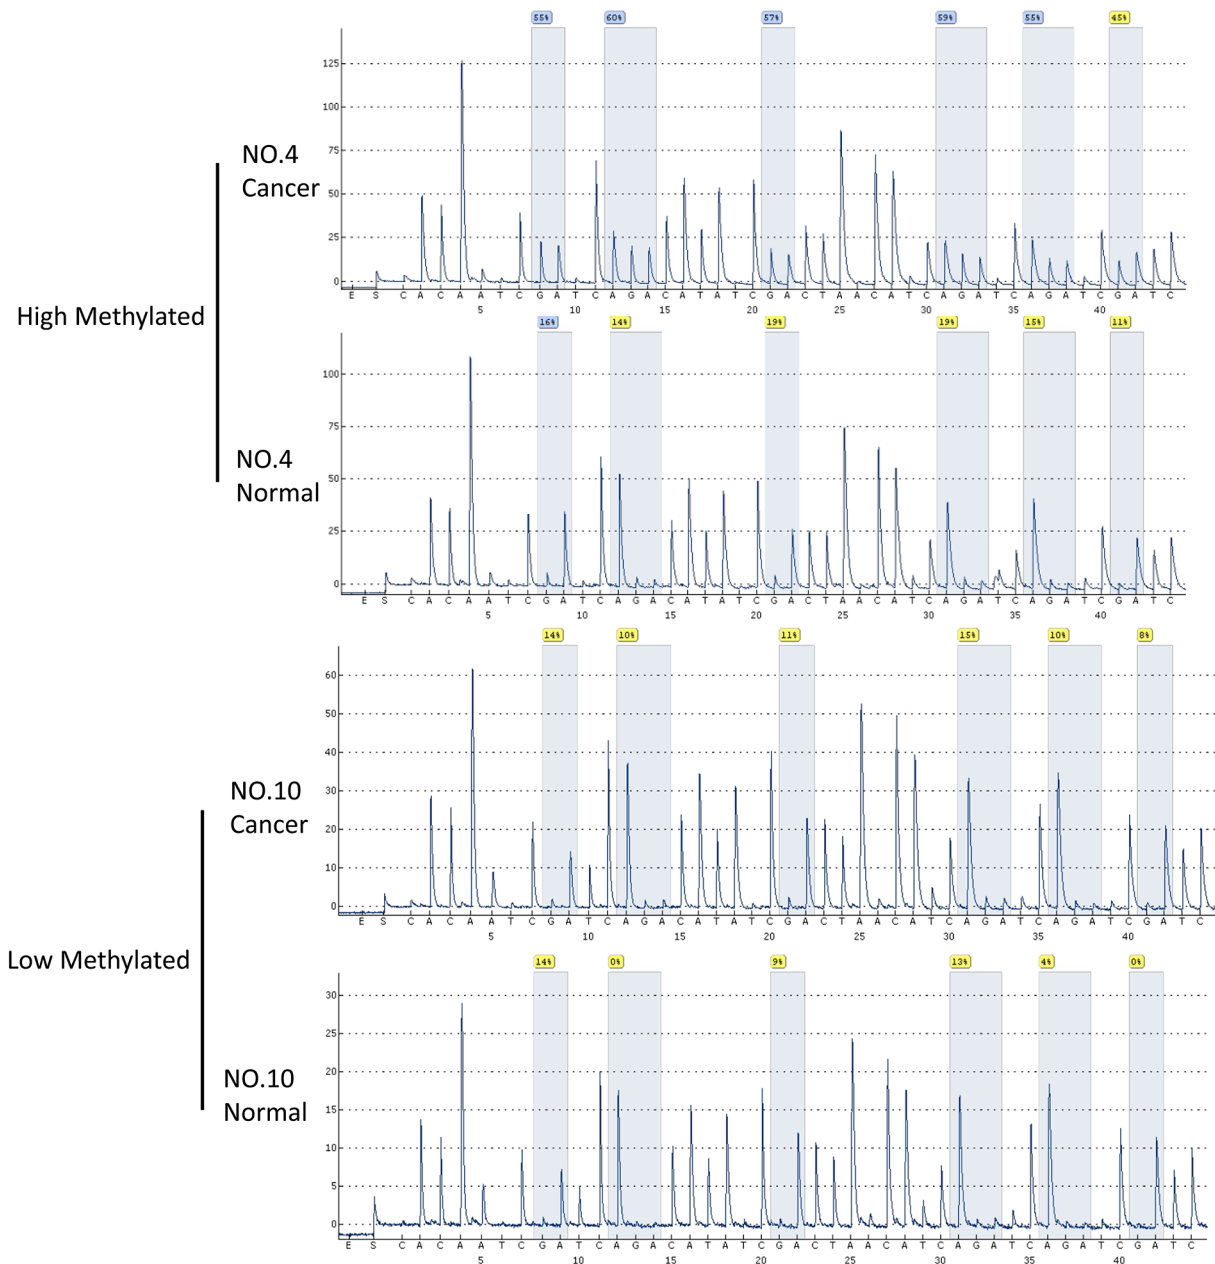

Supplementary Figure 2: Representative pyrosequencing results showing methylation patterns in high and low methylated GC patient samples.

**A**

| Methylation Percentage (%) |                  |                  |                  |                  |                  |                | Mean Meth. (%) | Samples |
|----------------------------|------------------|------------------|------------------|------------------|------------------|----------------|----------------|---------|
| Pos. 1 Meth. (%)           | Pos. 2 Meth. (%) | Pos. 3 Meth. (%) | Pos. 4 Meth. (%) | Pos. 5 Meth. (%) | Pos. 6 Meth. (%) | Mean Meth. (%) |                |         |
| 0.05                       | 0.02             | 0.03             | 0.05             | 0.03             | 0.10             | <b>0.05</b>    | BGC-823        |         |
| 0.08                       | 0.06             | 0.09             | 0.09             | 0.06             | 0.05             | <b>0.07</b>    | 7901           |         |
| 20.36                      | 26.53            | 21.71            | 23.08            | 16.41            | 14.93            | <b>20.50</b>   | AGS            |         |
| 10.69                      | 10.11            | 11.16            | 10.40            | 12.51            | 11.00            | <b>10.98</b>   | MKN-28         |         |
| 0.08                       | 0.06             | 0.09             | 0.09             | 0.06             | 0.05             | <b>0.07</b>    | HGC-27         |         |
| 15.99                      | 12.51            | 15.22            | 20.01            | 21.37            | 10.44            | <b>15.92</b>   | MKN-45         |         |
| 0.06                       | 0.05             | 0.10             | 0.04             | 0.05             | 0.05             | <b>0.06</b>    | GES-1          |         |

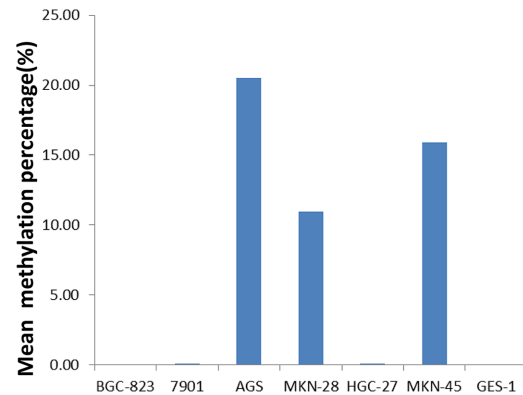**B**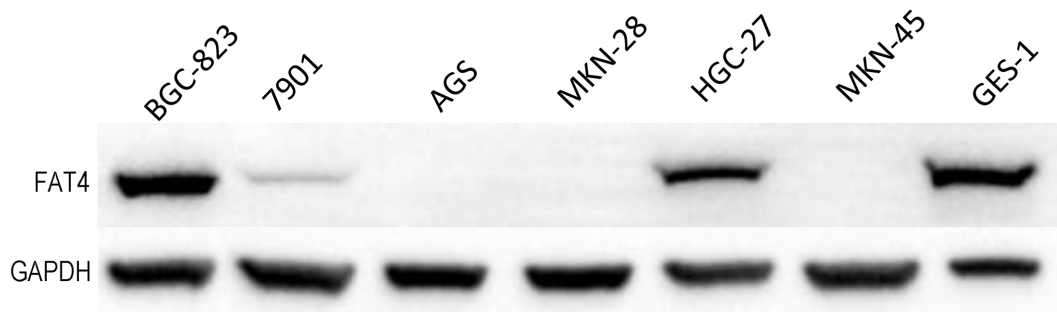

**Supplementary Figure 3: FAT4 promoter methylation pyrosequencing of GC cell lines and FAT4 expression in GC cell lines.** (A) Mean methylation percentages of the *FAT4* promoter in various GC cell lines. The AGS, MKN-28 and MKN-45 cells show *FAT4* promoter methylation, the mean methylation percentage of between 10% and 20%. However, the GES-1, HGC-27, 7901 and BGC-823 cells shown no *FAT4* promoter methylation. (B) Representative western blots demonstrating FAT4 expression in various GC cell lines. The GC cells BGC-823, GES-1, 7901 and HGC-27 shown FAT4 expression, whereas AGS, MKN-28 and MKN-45 shown no FAT4 expression. GAPDH was used as loading control.

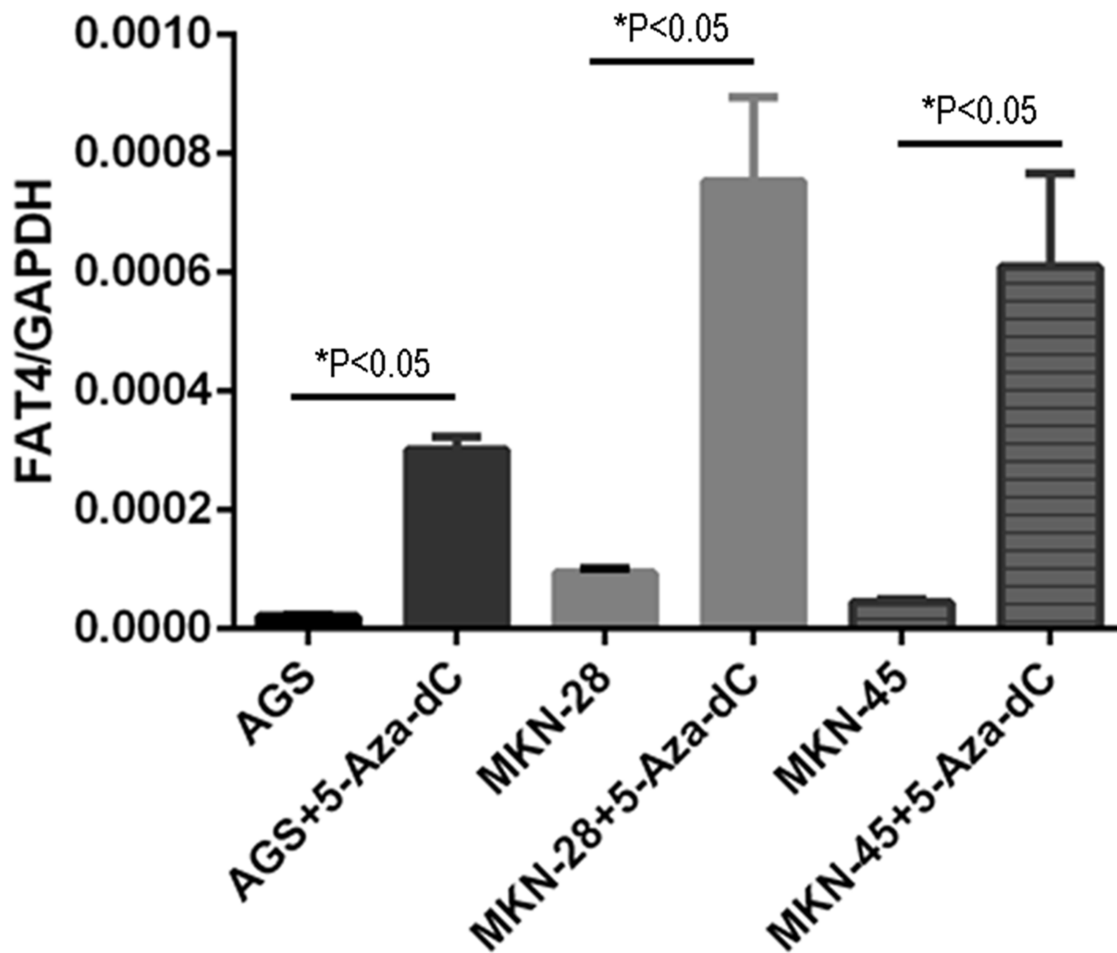

Supplementary Figure 4: 5-aza deoxycytidine increases FAT4 expression in BGC-823 cells. qRT-PCR analysis showing FAT4 levels in untreated and 5-Aza-Dc (1µM) treated BGC-823 GC cells. As shown, FAT4 levels increased upon 5-Aza-dC treatment (\*P<0.05).
